# Supplementary material
Source: publisher site journal article supplement (https://www.spandidos-publications.com/5054/downloadSupplementary)
Supplement: Supplementary file 1 [file downloadSupplementary]

## Sheet: Supplementary S2
Table SII. DECIPHER analysis reveals 9 OMIM genes at the region of 12p13.33.
Gene	Location	pLI	%HI
KDM5A	12:280057-389320	1	18.78
WNK1	12:752579-911452	1	26.22
IQSEC3	12:66767-178455	0	56.71
NINJ2	12:564296-663589	0	71.88
ERC1	12:990509-1495933	0	8.21
SLC6A12	12:190077-214570	0	46.64
RAD52	12:911736-990053	0	53.56
SLC6A13	12:220621-262873	0	22.86
B4GALNT3	12:459939-563509	0	70.31
